# 1 **Experimental demonstration that screening can enable the** 2 **environmental recruitment of a defensive microbiome**

3  
4 Tabitha Innocent<sup>1\*†</sup>, Neil Holmes<sup>2\*</sup>, Mahmoud Al Bassam<sup>2††</sup>, Morten Schiøtt<sup>1</sup>, István  
5 Scheuring<sup>3,4</sup>, Barrie Wilkinson<sup>5</sup>, Matthew I Hutchings<sup>2†</sup>, Jacobus J Boomsma<sup>1†</sup>, and  
6 Douglas W Yu<sup>2,6,7†</sup>

7  
8 <sup>1</sup> Centre for Social Evolution, Department of Biology, University of Copenhagen, 2100  
9 Copenhagen Ø, Denmark

10 <sup>2</sup> School of Biological Sciences, University of East Anglia, Norwich Research Park, Norwich,  
11 Norfolk NR4 7TJ United Kingdom

12 <sup>3</sup> MTA-ELTE Theoretical Biology and Evolutionary Ecology Research Group, Pázmány Péter  
13 sétány, 1/C, 1117, Budapest, Hungary

14 <sup>4</sup> MTA Centre for Ecological Research, Evolutionary Systems Research Group, Klebelsberg K. u.  
15 3, 8237, Tihany, Hungary

16 <sup>5</sup> Department of Molecular Microbiology, John Innes Centre, Norwich Research Park, Norwich,  
17 Norfolk NR4 7UH United Kingdom

18 <sup>6</sup> State Key Laboratory of Genetic Resources and Evolution, Kunming Institute of Zoology,  
19 Chinese Academy of Sciences, Kunming Yunnan, 650223 China

20 <sup>7</sup> Center for Excellence in Animal Evolution and Genetics, Chinese Academy of Sciences,  
21 Kunming Yunnan, 650223 China

22 \* Joint first authors

23 † Correspondence authors: [tabitha.innocent@bio.ku.dk](mailto:tabitha.innocent@bio.ku.dk), [m.hutchings@uea.ac.uk](mailto:m.hutchings@uea.ac.uk),  
24 [jjboomsma@bio.ku.dk](mailto:jjboomsma@bio.ku.dk), [dougwyu@mac.com](mailto:dougwyu@mac.com)

25 †† Current address: Division of Host-Microbe Systems & Therapeutics, Department of Pediatrics,  
26 University of California, San Diego, La Jolla, California 92093, USA

27  
28 **Keywords:** Attini, game theory, microbiome, mutualism, Actinobacteria, partner choice, leaf-cutting  
29 ants, *Pseudonocardia*, horizontal transmission, symbiosis

30 **Article type:** Letters.

31 **Word count:** Abstract = 148; Main text = 4767; Box 1 = 244

32 **Number of references:** 51

33 **Number of Figures, Tables, Boxes:** 3, 1 and 1 respectively

34 **Data accessibility statement:** The R scripts and data for analyses will be archived at  
35 [github.com/dougwyu/screening\\_Innocent\\_et\\_al](https://github.com/dougwyu/screening_Innocent_et_al).

36 **Author declaration:** DY, IS, JJB, MH conceived the research, and DY, MH, JJB, TI, NH, MAB, BW  
37 and IS designed the experiments. TI, MAB and MS isolated strains. TI and NH carried out the  
38 experiments. DY performed the statistical analysis. DY, JJB, TI and NH wrote the manuscript, with  
39 comments from all other authors.

## 40 **Abstract**

41 Many animals and plants recruit beneficial microbes from the environment, enhancing  
42 their defence against pathogens. However, we have only a limited understanding of  
43 the assembly mechanisms involved. A game-theoretical concept from economics,  
44 *screening*, potentially explains how a host can selectively recruit antibiotic-producing  
45 microbes from the environment, by fomenting and biasing competition among  
46 potential symbionts in such a way that the likely winners are mutualists. The cuticular  
47 microbiomes of *Acromyrmex* leaf-cutting ants inspired one of the first applications of  
48 screening theory to mutualisms, and here we use inoculation experiments to test the  
49 efficacy of screening *in vitro*. Using agar infused with antibacterial metabolites from  
50 the ants' vertically transmitted *Pseudonocardia* symbionts, we show that secondary  
51 antibiotic-producing bacteria have higher growth rates than do non-producer strains  
52 and are more likely to win in direct competition. Our results demonstrate how game-  
53 theoretical concepts from economics can provide powerful insight into host-  
54 microbiome coevolution.

## 55 **Introduction**

56 Many, perhaps most, animal and plant species recruit multiple strains of beneficial  
57 microbes from the environment, with one of the most common benefits being defence  
58 against pathogens (Kaltenpoth 2009; Barke *et al.* 2011; Seipke *et al.* 2012; Antwis *et*  
59 *al.* 2015; Loudon *et al.* 2016; Duarte *et al.* 2018; Engl *et al.* 2018). It is widely  
60 expected that diverse microbiomes provide a more reliable defence against pathogens  
61 than do single-species microbiomes, by allowing the equivalent of multi-drug therapy  
62 (reviews in Scheuring & Yu 2012; Seipke *et al.* 2012; Antwis & Harrison 2018;  
63 Duarte *et al.* 2018; Engl *et al.* 2018). However, despite an abundance of recent

64 studies, two recent reviews still conclude that “our ability to make predictions about  
65 these dynamic, highly complex communities is limited” (Hoye & Fenton 2018), and  
66 that “integration between theory and experiments is a crucial ‘missing link’ in current  
67 microbial ecology” (Widder *et al.* 2016).

68 *The Problem of Hidden Information.* – We have previously shown that a game-  
69 theoretical approach provides a powerful shortcut to modelling the coevolution of  
70 host-microbiome assemblies. Specifically, screening theory from economics (Archetti  
71 *et al.* 2011a; b; Scheuring & Yu 2012) conceptualises symbioses as a Principal-Agent  
72 game (Edwards *et al.* 2006; Weyl *et al.* 2010), in which a Principal (host) tries to  
73 recruit one or more suitable Agents (symbionts) out of all possible Agents (e.g. all  
74 microbes in the environment), some or most of which are unsuitable. The challenge is  
75 that the Principal does not know which Agents are suitable – that is, *the Agent’s*  
76 *characteristics are hidden*. This is the Problem of Hidden Information. The equivalent  
77 statement in evolutionary biology is that in horizontally acquired symbioses, a host is  
78 under selection to recruit mutualistic symbionts out of a species pool that includes  
79 both commensals and parasites, but the host is faced with the Partner Choice problem  
80 of not being able to recognise which species are mutualistic (Bull & Rice 1991).

81 Principal-Agent theory provides two solutions to the Problem of Hidden Information:  
82 *signalling* and *screening* (Archetti *et al.* 2011a; b). Honest signalling uses the display  
83 of costly phenotypes to reveal the quality of potential partners (Spence 1973; Grafen  
84 1990), but it is difficult to envision a cost that can signal cooperativeness *per se* (but  
85 see Archetti *et al.* 2016). Also, even if the host is able to discern symbiont qualities,  
86 the host might be unable to actively choose amongst the symbionts. Both problems  
87 apply to the recruitment of defensive symbionts where the host cannot use *signalling*  
88 because the host has no mechanism for actively choosing amongst symbiont lineages,

89 cannot identify their characteristics before establishment, or both (Scheuring & Yu  
90 2012).

91 Here, we present a set of *in vitro* experiments to demonstrate that ant hosts can  
92 instead use *screening* to selectively take up antibiotic-producing microbes from the  
93 pool of bacteria in the environment. First, we recap how screening works.

94 *Screening*. – Imagine a host faced with multiple potential symbionts differing in their  
95 benefit to the host. For simplicity, we assume two types, mutualistic and parasitic,  
96 where the latter includes commensals because they can impose opportunity costs on  
97 hosts (Yu 2001). It is possible for the host to selectively ‘screen-in’ mutualistic  
98 symbionts, provided that the host evolves a ‘demanding environment’, which imposes  
99 a cost on colonising symbionts that is easier to endure if they are mutualists. The  
100 benefit of enduring the cost is a host-provided reward that is high enough for the  
101 mutualist to enjoy a net benefit (see Box 1 for a human example).

102 Screening succeeds if the nature and size of the cost and benefit evolve so that only  
103 the mutualist reaps a sufficiently large net benefit for natural selection to reward  
104 colonisation of the host over any alternatives, including free living. Multiple  
105 screening mechanisms appear to exist in nature (Archetti *et al.* 2011a; b; see also  
106 Ranger *et al.* 2018). In particular, we have proposed that hosts evolve to foment  
107 competition among potential symbionts in such a way that the winners have a high  
108 probability of being mutualists, which we call *competition-based screening*. A good  
109 example is given by Heil (2013), who studied *Acacia* ant-plants, which can be  
110 colonised by ant species that either protect their hostplants (mutualists) or not  
111 (parasites). *Acacia* species that provide high amounts of food and housing to incipient  
112 ant colonies promote colony growth and worker activity, and the colony that wins the  
113 hostplant is the one whose workers kill off the other incipient colonies. Having

114 numerous, aggressive workers is also the defining characteristic of a mutualistic  
115 colony, since the workers attack herbivores. Thus, the demanding environment is  
116 interference competition amongst ants, fueled by the hostplant, and the ant species  
117 that are best able to endure this cost are the aggressive ones, which is correlated with  
118 their mutualistic service to the plant. The benefit of enduring the demanding  
119 environment is the high levels of plant-provided reward. This benefit, minus the cost  
120 of the risk of colony death due to fighting, is presumably greater than the alternative  
121 fitness from living in other microhabitats. What makes this an especially satisfying  
122 example is that there also exist *Acacia* species that provide low amounts of food and  
123 housing, and these species are regularly colonised by parasitic, non-defending ant  
124 colonies, whereas high-reward *Acacia* species are rarely colonised by parasitic ants.

125 **Box 1. A human example of a successful screening mechanism**

126 Any automobile-breakdown insurance company is faced with a *hidden information*  
127 problem. Potential clients differ in the probability that their cars will need rescue.

128 Owners of poor-quality cars are more willing to purchase insurance but will impose  
129 higher costs on insurers with their more frequent callouts. Owners of high-quality cars  
130 are less willing to pay for insurance but would be more profitable to insurers. The  
131 challenge for insurers is to find a way to charge a higher price to owners of poor-  
132 quality cars and a lower price to owners of high-quality cars, without needing to  
133 inspect the cars.

134 One solution can be viewed at [www.rac.co.uk/breakdown-cover](http://www.rac.co.uk/breakdown-cover) (accessed 30 May  
135 2018). Adding the ‘At home cover’ rescue option costs an additional £5/month, nearly  
136 doubling the cost of the cheapest cover at £5.50/month. Poor-quality cars run a  
137 nontrivial risk of failing to start in the morning. For high-quality cars, this risk is

138 negligible. In screening terms, the absence of ‘At Home’ recovery is *a burden that*  
139 *owners of high-quality cars are better able to endure*. If priced and designed  
140 correctly, the two types of owners will voluntarily sign up for the two different  
141 coverage levels.

142 A similar design challenge applies to costly, honest signalling, in which the signal has  
143 to be costly in a way that reveals a specific hidden quality. For instance, an expensive  
144 car is good at signalling wealth and poor at signalling fidelity or niceness.

145 *Attine defensive microbiomes*. – We have argued that competition-based screening is  
146 consistent with several biological details of the defensive cuticular microbiomes of  
147 attine fungus-growing ants (Scheuring & Yu 2012). These microbiomes produce  
148 antibiotics that can control specialised crop diseases, in particular mycopathogens of  
149 the genus *Escovopsis* (Currie *et al.* 2006), and may also provide brood hygienic  
150 protection (Mattoso *et al.* 2012). They are dominated by Actinobacteria, which are  
151 renowned as antibiotic producers (Kaltenpoth 2009; Barka *et al.* 2016; Worsley *et al.*  
152 2018), but only species of the actinobacterial genus *Pseudonocardia* are documented  
153 to be vertically transmitted and sufficiently well-studied to qualify as a co-evolving  
154 symbiont of attine ants (Cafaro *et al.* 2011; Andersen *et al.* 2013). Other detected  
155 actinobacterial strains (a less restrictive term used in preference to ‘species’ in  
156 microbiology) might also be resident but are horizontally acquired, or alternatively  
157 might be transient and provide no benefits. Although the relevance of these two  
158 transmission routes is not in doubt, their relative importance has been extensively  
159 debated without consensus (Sen *et al.* 2009; Cafaro *et al.* 2011; Mueller 2012).  
160 Scheuring and Yu’s (2012) model tried to resolve this debate by pointing out that the  
161 *Pseudonocardia* biofilm coats the worker surface in antibacterial compounds,

162 rendering this a demanding environment that we expect antibiotic-resistant strains to  
163 be best able to endure. This is because antibiotic-producing bacteria must also have  
164 antibiotic resistance, or they would commit suicide when producing antibacterial  
165 compounds. Thus, we expect the quality that allows potential symbionts to endure this  
166 demanding environment (resistance to antibacterials) to be strongly correlated with  
167 the quality that makes them mutualistic (antibiotic production). Attine biology  
168 supports the assumption that the demanding environment is paired with high rewards,  
169 because the genus-level lineages that host actinobacterial biofilms appear to feed them  
170 with subcuticular exocrine glands (Currie *et al.* 2006) – although the secretions of  
171 these glands have not yet been characterised.

172 Screening can potentially explain two other aspects of attine ant biology. Firstly, in  
173 the crown-group genus *Acromyrmex*, newly hatched workers are inoculated with  
174 *Pseudonocardia* by their sister workers (Poulsen *et al.* 2003b; Andersen *et al.* 2013;  
175 Marsh *et al.* 2014), and the monoculture biofilm subsequently blooms over almost the  
176 entire worker surface, then retreats to the ant's ventral chest plates after ca. 25 days,  
177 when the workers start to forage outside the nest (Poulsen *et al.* 2003a; Andersen *et*  
178 *al.* 2013). At this time it becomes possible to detect the presence of other bacteria on  
179 the ant's surface, many of which are also Actinobacteria (Poulsen *et al.* 2005;  
180 Andersen *et al.* 2013).

181 Secondly, Andersen *et al.* (2013) have documented that *Acromyrmex* colonies hosting  
182 one of the native *Pseudonocardia* species (*P. octospinosus*, also known as 'Ps1') are  
183 colonised by a more diverse secondary cuticular microbiome than are *Acromyrmex*  
184 colonies hosting the other species (*P. echinator*, 'Ps2') (species described in Holmes  
185 *et al.* 2016). For simplicity, we refer to these as Ps1 and Ps2. Screening theory  
186 predicts that Ps2 imposes the more demanding environment for secondary invaders,

187 by making stronger or more antibacterials. This would reduce the likelihood of  
188 successful colonisation by competitors, but may make the mutualist more costly for  
189 the host that provides the resources for its growth. Genomic analysis has confirmed  
190 that Ps1 and Ps2 have different sets of secondary metabolite clusters and thus likely  
191 produce different spectra of antimicrobial compounds (Holmes *et al.* 2016).

192 *Tests of screening.* – Experimental tests of mechanisms that could promote selective  
193 recruitment are missing from the microbiome literature (Widder *et al.* 2016; Hoyer &  
194 Fenton 2018). We address this gap with an *in vitro* model emulating the dynamics on  
195 the cuticle of *Acromyrmex* ants. Using *Pseudonocardia* cultures, we created two types  
196 of environment on agar media: *demanding* (where growth media are infused with  
197 secondary metabolites from *Pseudonocardia*), and *undemanding* (where symbiont  
198 metabolites were absent). We then introduced a selection of different bacterial strains  
199 representing two classes of potential colonisers from the environment – a set of  
200 antibiotic-producing Actinobacteria (*producers*) and a set of bacteria that do not  
201 produce antibiotics (*non-producers*) – and we tested the prediction that *producers* are  
202 better invaders (by measuring growth rates in the demanding environment) than are  
203 *non-producers*. We also staged direct-competition experiments between *producers*  
204 and *non-producers* on both *demanding* and *undemanding* media.

205 We show that antibiotic-*producers* grow relatively more quickly on *demanding*  
206 (toxic) media despite growing relatively more slowly on *undemanding* (non-toxic)  
207 media, as predicted by screening theory. This result also parsimoniously explains the  
208 outcome of the direct-competition experiment, in which antibiotic-*producers* are  
209 superior competitors on toxic media, while *non-producers* are superior competitors on  
210 non-toxic media. Finally, we also confirm the assumption that antibiotic-*producers*



211 are more resistant to antibiotics and the prediction that *Pseudonocardia* Ps2 strains  
212 are stronger growth-suppressors of other bacteria.

## 213 **Materials & Methods**

214 We obtained:

215 (1) a set of *Pseudonocardia* Ps1 and Ps2 strains to grow on agar plates, after which  
216 we flipped the agar to expose a surface that was open for colonisation but infused  
217 with *Pseudonocardia* metabolites. We and others have shown that *Pseudonocardia*  
218 releases antibacterials and antifungals when grown in culture (Barke *et al.* 2010;  
219 Holmes *et al.* 2016; Van Arnam *et al.* 2016);

220 (2) a set of ‘environmental’ *antibiotic-producing* bacterial strains, defined as not  
221 having an evolutionary history of growing on the cuticle of *Acromyrmex* ants;

222 (3) a set of ‘environmental’ *non-antibiotic-producing* bacterial strains, defined as not  
223 having an evolutionary history of growing on the cuticle of *Acromyrmex* ants; and

224 (4) a set of bacterial strains that reside in the cuticular microbiomes of *Acromyrmex*  
225 workers while being *non-antibiotic-producing*, which in theory should preclude their  
226 survival in cuticular biofilms. We asked why these bacteria do not competitively  
227 exclude the resident *antibiotic-producers*, since they are presumably resistant to  
228 *Pseudonocardia* metabolites but do not pay the cost of producing antibiotics. We use  
229 the term ‘resident’ only to indicate that we isolated these strains from *Acromyrmex*  
230 cuticles; we do not imply that these strains are true native residents like  
231 *Pseudonocardia*.

232 For bacterial growth media, we used Soya Flour + Mannitol (SFM) agar (20g soya  
233 flour, 20g mannitol, 20g agar in 1L tap water) and Lysogeny Broth (LB) Lennox (10g  
234 tryptone, 5g yeast extract, 5g NaCl in 1L deionised water).

235 *Collection and isolation of bacterial strains*

236 (1) Nineteen Ps1 and Ps2 strains were isolated from the cuticles of individual workers  
237 of the leaf-cutting ant *Acromyrmex echinator* (Hymenoptera, Formicidae, Attini).  
238 The 19 colonies of these workers were collected in Soberania National Park, Panama,  
239 between 2001 and 2014, and reared in climate-controlled rooms at the University of  
240 Copenhagen at ca. 25 °C and 70% relative humidity. The propleural chest plates of  
241 individual ants – where the white *Pseudonocardia* biofilms grows most conspicuously  
242 (Poulsen *et al.* 2003b; Currie *et al.* 2006) – were scraped with a sterile needle under a  
243 stereomicroscope and immediately streak-inoculated across Lennox (LB) media under  
244 sterile conditions. The plates were then incubated at 30 °C until visible growth of  
245 distinctive white ‘cotton ball’ colonies of *Pseudonocardia* were clearly apparent.  
246 These individual colonies were removed under sterile (LAF bench) conditions and  
247 inoculated onto fresh plates, a process that was repeated until clean *Pseudonocardia*  
248 cultures were isolated. The *Pseudonocardia* isolates were then grown on Mannitol  
249 Soya Flour (SFM) media (optimal for actinobacterial growth and spore production),  
250 from which spore stock solutions were prepared in 20% glycerol and kept at -20 °C  
251 until use. Each isolate was genotyped to Ps1 or Ps2 (Supplementary Information S1).  
252 Five strains from each of these two species have previously been genome-sequenced,  
253 formally described, and functionally characterised as different *Pseudonocardia*  
254 species by Holmes et al. (2016): *P. octospinosus* (Ps1) and *P. echinator* (Ps2).

255 (2) The 10 environmental antibiotic-producing strains (all *Streptomyces*) were taken  
256 from general collections in the Hutchings lab (Tables 1, S2).

257 (3) The 10 environmental non-antibiotic-producing strains were obtained from the  
258 Hutchings lab (2 strains) and from the ESKAPE suite (8 strains) – a set with varying  
259 origins (human skin, soil, etc.) associated with hospital-acquired infections and used  
260 to test antibiotic resistance or efficacy in clinical/research settings (Tables 1, S2).

261 (4) The 10 *Acromyrmex*-resident, non-antibiotic-producing strains were isolated from  
262 *A. echinator* and *A. octospinosus* ants by culturing from cuticular washes or from the  
263 *Pseudonocardia* isolations above. These strains were 16S-genotyped and where  
264 possible assigned to genus level by comparison to the NCBI 16S RefSeq database  
265 (Supplementary Information S1, Tables 1, S2).

266

267

268

269

270

271

272

273

274

275 **Table 1.** The bacterial strains used in our experiments: the 19 *Pseudonocardia* strains isolated from  
 276 *Acromyrmex echinatior* (columns 1 and 2); the 10 environmental *antibiotic-producer* strains (column 3);  
 277 the 10 environmental *antibiotic-non-producer* strains (column 4); and the 10 *Acromyrmex-resident*,  
 278 *antibiotic-non-producer* strains (column 5). Details for all strains not isolated from *Acromyrmex* in Table  
 279 S2.

| 8 <i>Pseudonocardia</i><br>Ps1 strains<br>(colony of origin) | 11 <i>Pseudonocardia</i><br>Ps2 strains<br>(colony of origin) | 10 environmental<br>antibiotic-producing<br>strains (all <i>Streptomyces</i> ) | 10 environmental<br>non-producer strains   | 10 <i>Acromyrmex-resident</i><br>non-producer strains |
|--------------------------------------------------------------|---------------------------------------------------------------|--------------------------------------------------------------------------------|--------------------------------------------|-------------------------------------------------------|
| Ae356*                                                       | Ae406*                                                        | S1. <i>Streptomyces</i> M1146                                                  | St1. <i>Escherichia coli</i>               | Sr1. <i>Ochrobactrum sp.</i>                          |
| Ae263*                                                       | Ae160                                                         | S2. <i>S. lividans</i>                                                         | St2. <i>Lysobacter<br/>antibioticus</i>    | Sr2. <i>Erwinia sp.</i>                               |
| Ae322                                                        | Ae505*                                                        | S3. <i>S. coelicolor</i>                                                       | St3. <i>Bacillus subtilis</i>              | Sr3. <i>Acinetobacter sp.</i>                         |
| Ae150a*                                                      | Ae717*                                                        | S4. <i>S. scabies</i>                                                          | St4. <i>Pseudomonas<br/>putida</i>         | Sr4. <i>Sphingobacterium sp.</i>                      |
| Ae168*                                                       | Ae703                                                         | S5. <i>S. venezuelae</i>                                                       | St5. <i>Erwinia caratova</i>               | Sr5. <i>Acinetobacter sp.</i>                         |
| Ae707-CP-A2*                                                 | Ae702                                                         | S6. <i>S. Ae150A-B1</i>                                                        | St6. <i>Enterobacter<br/>aerogenes</i>     | Sr6. <i>Luteibacter sp.</i>                           |
| Ae712†                                                       | Ae707                                                         | S7. <i>S. Ae356-S1</i>                                                         | St7. <i>Acinetobacter<br/>baylyi</i>       | Sr7. <i>Flavobacterium sp.</i>                        |
| Ae280†                                                       | Ae331*                                                        | S8. <i>S. KY5</i>                                                              | St8. <i>Staphylococcus<br/>epidermidis</i> | Sr8. <i>Brevundimonas sp.</i>                         |
| -                                                            | Ae706*                                                        | S9. <i>S. S4</i>                                                               | St9. <i>Micrococcus<br/>luteus</i>         | Sr9. <i>Acinetobacter sp.</i>                         |
| -                                                            | Ae704                                                         | S10. <i>S. Amy1</i>                                                            | St10. <i>Serratia KY15</i>                 | Sr10. <i>Brachybacterium sp.</i>                      |
| -                                                            | Ae715                                                         | -                                                                              | -                                          | -                                                     |

\* *Pseudonocardia* strains that have been genome-sequenced (Holmes *et al.* 2016)

† *Pseudonocardia* strains that were only used in the growth-rate experiment with *Acromyrmex-resident non-producers*.

280

### 281 *Individual growth-rate experiments*

282 We measured bacterial colony growth rates by growing all *producer* and *non-*  
 283 *producer* strains on antibiotic-infused and control media.

284 To create the antibiotic-infused media, we grew lawns of the 19 *Pseudonocardia*  
 285 isolates (Table 1), plating 30 µl on 90 mm SFM agar plates. The control plates were  
 286 inoculated with glycerol only (20%; identical to that used for making solutions from

287 *Pseudonocardia* strains). We incubated these plates at 30 °C for 6 weeks, which  
288 ultimately produced lawns from 17 strains that could be included in the experiments  
289 (6 Ps1 and 11 Ps2 strains). Once each plate was fully (not necessarily uniformly)  
290 covered, we flipped the agar to reveal a surface open for colonisation.

291 The sets of 10 environmental antibiotic-*producers* (all *Streptomyces* spp.) and of 10  
292 environmental *non-producers* (Table 1) were inoculated onto the different media  
293 types. Each agar plate was inoculated with 10 evenly spaced colonies, with 3  
294 replicates, generating 2 invader types x 17 Ps-media-types x 3 replicates = 102 Ps1/2-  
295 infused plates and 2 x 3 = 6 control plates, i.e. a total of 1020 treatment inoculations  
296 and 60 control inoculations. Each strain inoculation used 5 µl of solution (at  
297 approximately  $1 \times 10^6$  cells per ml in 20% glycerol), spotted at evenly spaced  
298 positions and without coming into direct contact. All plates were incubated at 30 °C  
299 for five days, after which photographs were taken under sterile conditions.

300 Images were processed in Fiji software (Schindelin *et al.* 2012; Rueden *et al.* 2017),  
301 creating binary negatives (black & white) so automated tools could identify discrete  
302 areas of growth (regions in black) and measure growth areas for each invading strain;  
303 in the few cases where binary image resolution was insufficient, outlines were added  
304 manually before area calculation. 48 *producer*-inoculated and 57 *non-producer*-  
305 inoculated treatment measurements were excluded because plate condition had  
306 deteriorated to become unscorable or they were contaminated, leaving a final sample  
307 size of  $1020 - 48 - 57 = 915$  treatment inoculations and 60 controls.

308 The second growth-rate experiment compared the 10 *Acromyrmex*-resident, *non*-  
309 *producer* strains with 9 of the environmental *producer* strains. All 19 *Pseudonocardia*  
310 strains grew sufficiently to be included in this experiment, and each plate was again  
311 inoculated with 10 or 9 evenly spaced colonies. Starting sample sizes were therefore 2

312 invader types x 19 Ps-media-types x 3 replicates = 114 Ps1/2-infused plates and 2 x 3  
313 = 6 control plates, giving a total of 1083 treatment inoculations and 57 controls. 50  
314 *producer* and 20 *non-producer* treatment measurements were excluded for the same  
315 reasons as above, giving a final sample of 1083-50-20=1013 treatment inoculations  
316 and 57 controls for scoring as described above.

317 *Pairwise competition experiment*

318 Building on the above experiment, where *producer* strains had relatively higher  
319 growth rates on *Pseudonocardia*-infused media, we tested whether this growth  
320 advantage (plus any direct interference interactions) could result in competitive  
321 exclusion of *non-producers*. We co-inoculated pairs of environmental *producers* and  
322 *non-producers* on both *Pseudonocardia*-infused media and control media (prepared as  
323 in the individual growth-rate experiment), and we measured the outcome of  
324 competition as a win, loss, or draw. We predicted that the *producer* strains would be  
325 more likely to win when competing on *Pseudonocardia*-infused media.

326 To keep the number of tests manageable, we used only two combinations of  
327 *Pseudonocardia* and *Streptomyces*: *Pseudonocardia* Ps1 (strain Ae707) +  
328 *Streptomyces* S8 and *Pseudonocardia* Ps2 (strain Ae717) + *Streptomyces* S2 (Table  
329 1). These combinations are representative of the results from the growth-rate  
330 experiment: the two *Streptomyces* strains grew more slowly than most of the *non*-  
331 *producers* on control media and either near the median growth rate of (S8) or faster  
332 than (S2) the *non-producers* on *Pseudonocardia*-infused media.

333 We competed *Streptomyces* S8 and S2 against the 10 environmental *non-producer*  
334 strains (20 pairings), using spore titrations of S8 and S2 consisting of 10<sup>6</sup> spores per  
335 ml for each strain in 20% glycerol. Non-producers were grown overnight in 10 ml

336 LB-Lennox, subcultured with a 1:100 dilution into a fresh 10 ml LB-Lennox, grown  
337 at 37 °C for 3-4 hours, after which OD600 was measured, assuming that OD600 = 1  
338 represented  $8 \times 10^9$  cells. Similar dilutions of  $10^6$  cells per ml were made for each  
339 *non-producer* strain in 20% glycerol, after which *producer* and *non-producer*  
340 dilutions were mixed 1:1. Each pair of *producer* and *non-producer* was co-inoculated  
341 as a mixture of 20  $\mu$ l ( $10^4$  spore-cells of each) on the designated *Pseudonocardia*-  
342 infused media (set up as above) with 5 replicates per pairing. We used 150 plates for  
343 the S8 experiment (including 100 control plates; 10 replicates per pairing) and 100  
344 plates for the S2 experiment (including 50 control plates; 5 replicates per pairing).  
345 Plates were incubated at 30 °C for 5 days and then photographed, after which images  
346 were scored with respect to the *producer* as: win (dominant growth), draw (both  
347 strains growing with no clear dominant), or loss (little or no visible growth), with  
348 reference to images of each strain grown alone on control media to minimise observer  
349 bias. One plate's outcome was too ambiguous to score and was omitted. All plates  
350 were independently scored by two observers, one using only photos, which produced  
351 data sets giving the same statistical results. We report the results from the observer  
352 who scored from direct observation.

### 353 *Antibiotic-resistance profiles*

354 The key assumption of screening theory is that antibiotic-*producers* are better at  
355 resisting antibiotics, as measured by growth rates in the presence of antibiotics,  
356 because this correlation is what allows *producer* strains to better endure the  
357 demanding environment produced by *Pseudonocardia*. We tested this assumption by  
358 growing the 10 environmental *producer* strains and the 10 environmental *non*-  
359 *producer* strains (Table 1, S2) in the presence of 8 different antibiotics, representing a  
360 range of chemical classes and modes of action. Antibiotics were added to 1 ml of LB-

361 Lennox medium in a 24-well microtitre plate at 6 different concentrations. The  
362 relative concentration range was the same for each antibiotic, although actual  
363 concentrations reflected activity (Table S3). *Producers* and *non-producers* were  
364 inoculated onto plates and incubated at 30 °C for 7 days, then photographed (Table  
365 S3). Lowest Effective Concentration (LEC, lowest concentration with inhibitory  
366 effect) and Minimum Inhibitory Concentration (MIC, lowest concentration with no  
367 growth) scores were assigned on a Likert scale of 1–6, where 1 was no resistance and  
368 6 was resistance above the concentrations tested (adapted from generalised MIC  
369 methods; reviewed by Balouiri *et al.* 2016).

#### 370 *Statistical analyses*

371 Initial models revealed correlated residuals by *Pseudonocardia* strain media and by  
372 inoculant strain, so we used mixed-effects models to incorporate strain identities as  
373 random intercepts, and we nested plate replicate within the *Pseudonocardia* strains.  
374 Statistical significance was determined by term deletion, and final-model residuals  
375 were approximately homoscedastic and uncorrelated within random factor levels.  
376 Analyses were carried out in R 3.4.4 (R Core Team 2017) with *lme4* 1.1-17 (Bates *et*  
377 *al.* 2015), *tidyverse* 1.2.1 (Wickham 2017), and *RColorBrewer* 1.1-2  
378 ([www.colorbrewer.org](http://www.colorbrewer.org), accessed 4 Mar 2018). R scripts and data are available in  
379 Supplementary Information (S4) and at  
380 [github.com/dougwyu/screening\\_Innocent\\_et\\_al](https://github.com/dougwyu/screening_Innocent_et_al).

## 381 **Results**

382 *Individual growth-rate experiments.* – As predicted by the screening model, *non-*  
383 *producers* grew more quickly on undemanding control media and *producers* had  
384 higher growth rates on the demanding *Pseudonocardia*-infused media, producing a



385 highly significant statistical interaction effect (Fig. 1A). There was also a significant  
386 main effect of *Pseudonocardia* genotype, with both *non-producers* and *producers*  
387 exhibiting a lower growth rate on Ps2-infused media, relative to Ps1-infused media,  
388 consistent with Andersen et al.'s (2013) observation that *Acromyrmex* colonies  
389 hosting Ps2-dominated cuticular microbiomes were less prone to secondary invasion  
390 by other bacteria.

391 The resident *non-producers* isolated from cuticular microbiomes had significantly  
392 slower growth rates overall, even on control media without antibiotics (Fig. 1B). This  
393 suggests that they are unable to outcompete *producer* strains on the cuticle of  
394 *Acromyrmex* ants and raises the question why these *non-producer* species can persist  
395 at all.

396

397

398

A. Growth rates of environmental *non-producers* vs. *producers*

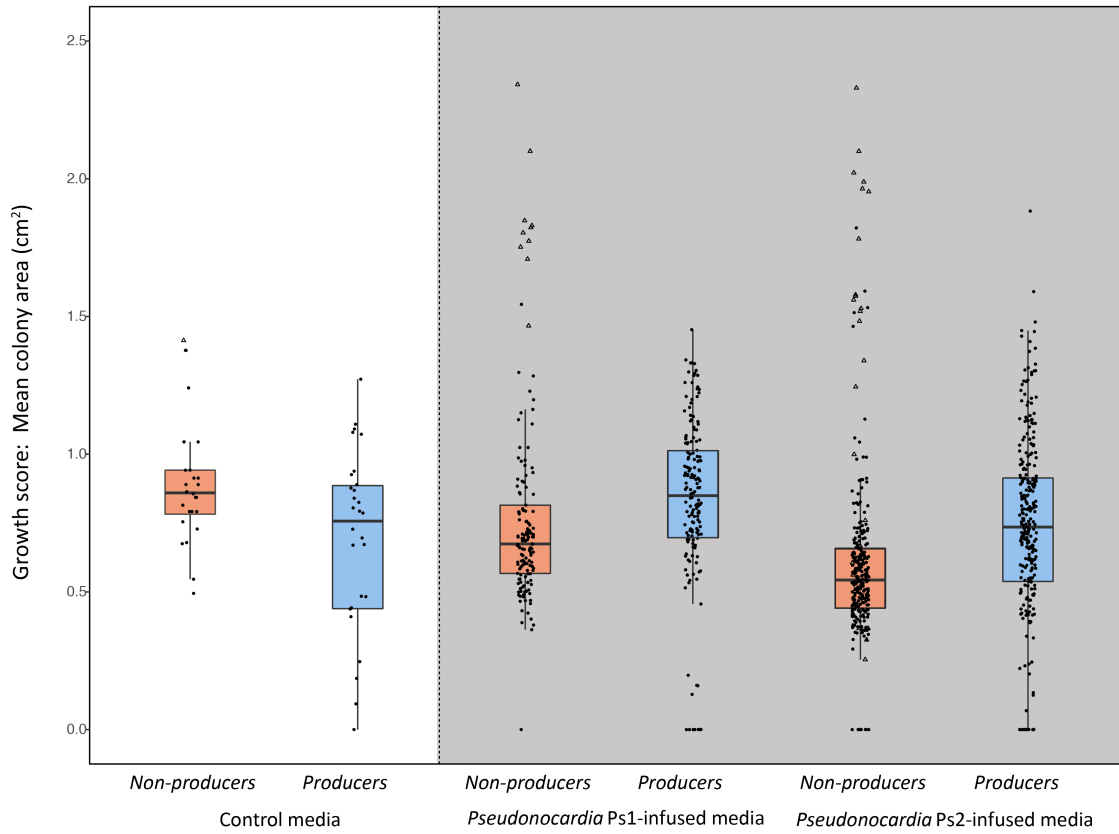

399

B. Growth rates of *Acromyrmex* resident *non-producers* vs. *producers*

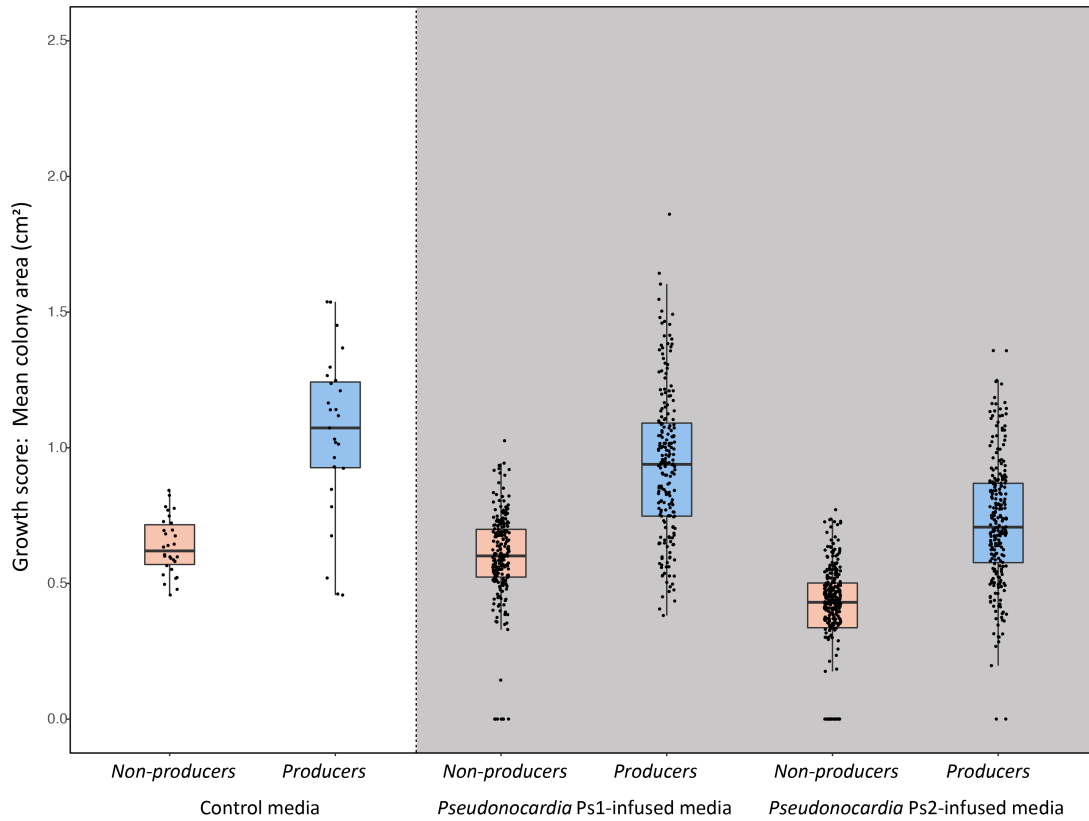

400

401 **Figure 1.** Individual growth-rate experiments. Bacterial colony sizes after 5 days at 30 °C,  
402 with the boxplots indicating medians  $\pm$  one quartile. The white section shows growth rates  
403 on control media, and the grey section shows growth rates on the *Pseudonocardia*-infused  
404 media. Coral boxes represent *non-producer* strains, and blue boxes represent *producer*  
405 strains. For analysis, a linear mixed-effects model, including *Pseudonocardia* strain  
406 (*Ps.strain*, 17 groups) and inoculated bacterial species (*Inv.strain*, 20 groups) as  
407 random intercepts, was used to test for interaction and main effects of growth media  
408 (Control vs. Ps1.infused vs. Ps2.infused) and antibiotic production  
409 (Non.producers vs. Streptomyces): (*lme4::lmer*(Growth.score ~ Media \*  
410 Antibiotic.production + (1|Ps.strain/Plate) + (1|Inv.strain)). **A.**  
411 Environmental strains. There was a highly significant interaction effect, such that  
412 environmental non-producer strains grow more rapidly on control media, while  
413 *Streptomyces* grow more rapidly on *Pseudonocardia*-infused media ( $n = 975$ ,  $\chi^2 = 45.86$ ,  $df =$   
414  $2$ ,  $p < 0.0001$ ). There was also a highly significant main effect of *Pseudonocardia* genotype,  
415 with growth being lower on Ps2-infused media ( $n = 915$ ,  $\chi^2 = 24.55$ ,  $df = 1$ ,  $p < 0.0001$ ,  
416 control-media data omitted for this analysis). One non-producer strain (*Staphylococcus*  
417 *epidermidis*) grew more rapidly than all other strains (open triangle points), demonstrating  
418 the need to control for correlated residuals by strain. The y-axis has been truncated at 2.5  
419 for clarity (the full figure is in Supplementary Information). **B.** *Acromyrmex*-resident, *non-*  
420 *producer* strains. There was no interaction effect ( $\chi^2 = 2.64$ ,  $df = 2$ ,  $p = 0.27$ ), but both main  
421 effects were highly significant. The *non-producers* grow more slowly on all media types ( $\chi^2 =$   
422  $20.96$ ,  $df = 1$ ,  $p < 0.0001$ ), and bacterial growth was generally slower on Ps2-infused media  
423 ( $\chi^2 = 21.43$ ,  $df = 1$ ,  $p < 0.0001$ , control-media data omitted).

424

425 *Pairwise competition experiment.* – The two *producer* strains were much more likely  
426 to win in direct competition against the *non-producer* strains when grown on the toxic  
427 (*Pseudonocardia*-infused) media (Fig. 2), which demonstrates that growth rates in  
428 isolation (Fig. 1A) are sufficient predictors of success in competitive interactions,  
429 although other interactions, such as antibiotic production by the *Streptomyces*, likely  
430 also contribute. These results support the screening model prediction that a  
431 demanding environment (facilitated by a host) can determine the profile of successful  
432 colonisers of the cuticular microbiome.

433

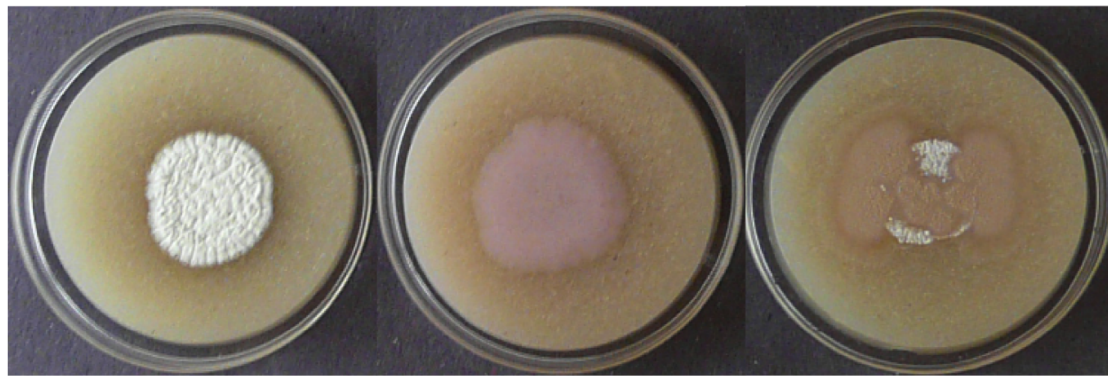

*Streptomyces* win

*Streptomyces* loss

Draw

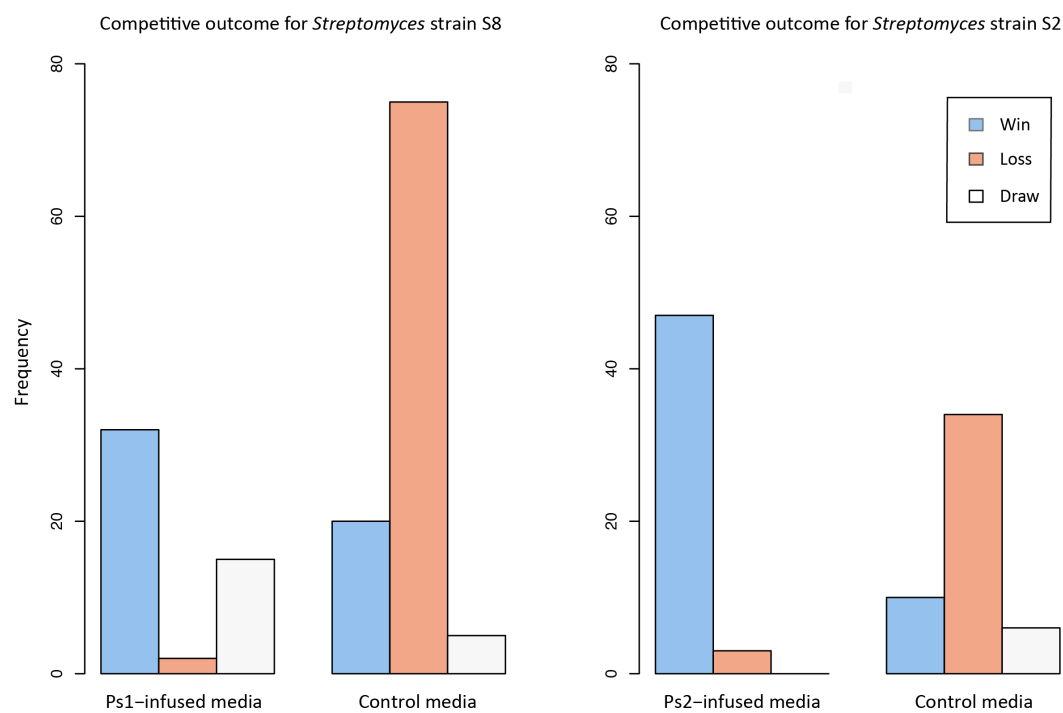

434

435 **Figure 2.** Pairwise competition experiment, scoring whether or not *producers* prevail. **A.**

436 Representative images of agar plates at five days post-inoculation showing examples of the

437 three competitive outcomes: Win (S2 vs. St3 on Ps2 media), Draw (S2 vs. St3 on control

438 media), and Loss (S8 vs. St3 on control media; strain details in Table 1). **B.** Barcharts of

439 competitive outcomes for the two *Streptomyces* producer strains (S8 and S2; Table 1), each

440 pairwise co-inoculated with ten non-antibiotic-producer strains on *Pseudonocardia*-infused

441 media and on control media. For analysis, draw outcomes were omitted, and a general

442 linear mixed-effects model, including non-antibiotic-producer strain as a random intercept

443 (10 groups), was used to test for an effect of the medium term (Control vs. Ps1/2-  
444 infused) on competitive outcome (Win vs. Loss) (`lme4::glmer(outcome ~`  
445 `medium + (1|non.producer.strain), family = binomial)`). Significance was  
446 estimated using term deletion. In both experiments, *producer* strains (*Streptomyces*) were  
447 more likely to be competitively superior when grown on the *Pseudonocardia*-infused media  
448 (Left:  $n = 129$ ,  $\chi^2 = 103.6$ ,  $df = 1$ ,  $p < 0.0001$ ; Right:  $n = 94$ ,  $\chi^2 = 87.9$ ,  $df = 1$ ,  $p < 0.0001$ ).

449

450 The screening model assumes that *producer* strains have greater resistance to  
451 antibiotics than do *non-producer* strains. We confirmed this assumption for this  
452 experiment because both the Lowest Effective Concentration (LEC, lowest  
453 concentration with inhibitory effect) and the Minimum Inhibitory Concentration  
454 (MIC, lowest concentration with no growth) were greater for the *producer* strains  
455 (Fig. 3). We also observed that the *resident non-producers* had high levels of  
456 antibiotic resistance (Fig. 3), as expected (Fig. 1B).

Innocent et al.

Screening in mutualists

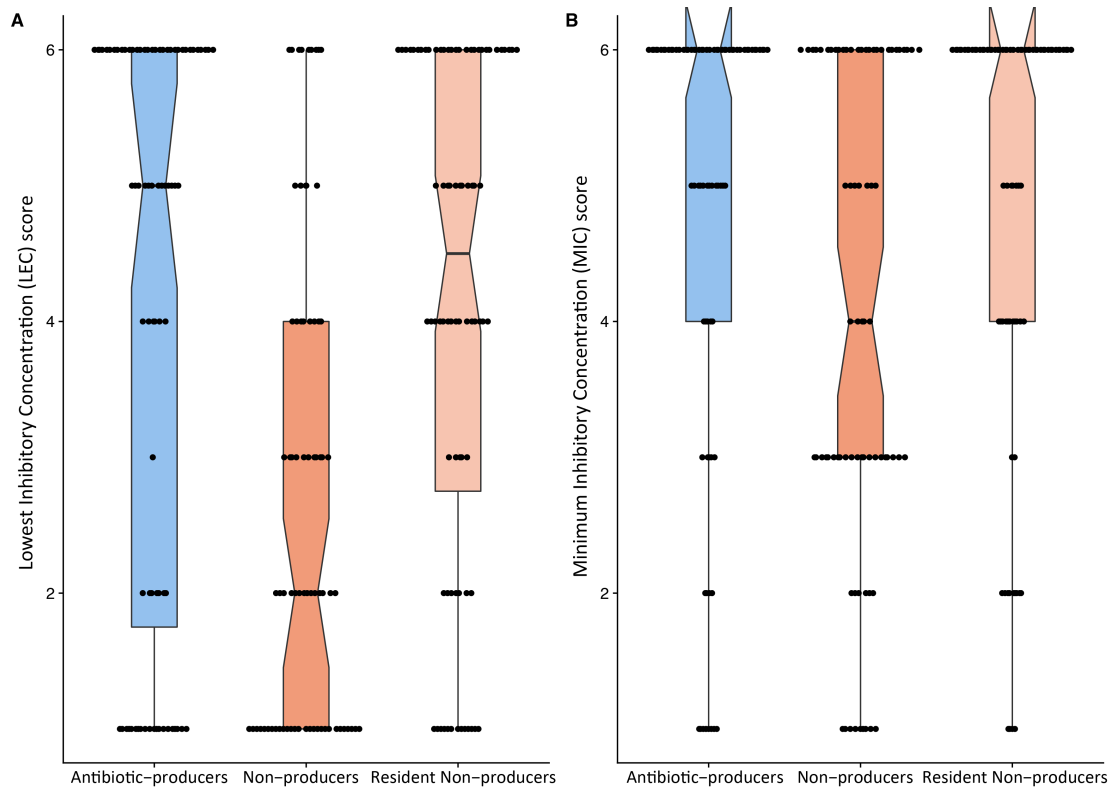

457

458 **Figure 3.** Antibiotic resistance profiles for *producer*, *non-producer*, and *resident non-*  
459 *producer* strains (Table 1). Boxplots indicate medians (notches)  $\pm$  one quartile. For analysis,  
460 we calculated each strain's mean growth score across the eight tested antibiotics (reducing  
461 from  $n = 155$  to  $n = 20$ ; details in S3). *Producers* showed higher levels of resistance than did  
462 *non-producers* for both measurements: Wilcoxon two-sided test (`wilcox.test`),  $W =$   
463  $94.5$ ,  $p = 0.0017$  for LEC (A) and  $W = 80$ ,  $p = 0.0253$  for MIC (B), after correction for two tests  
464 (`p.adjust(method="fdr")`). *Producers* and *Resident Non-producers* showed no  
465 difference in resistance levels ( $p = 0.44$  and  $0.25$ ).

## 466 Discussion

467 We used *in vitro* experiments to test key predictions and assumptions of a screening  
468 model (Scheuring & Yu 2012) that was designed to explain how leaf-cutting ants  
469 could use a vertically transmitted symbiont, *Pseudonocardia*, to selectively recruit

470 additional antibiotic-producing bacterial strains from the large pool of potential  
471 bacterial symbionts present in the environment.

472 We showed that *non-producer* invasive strains grow more slowly than do antibiotic-  
473 *producer* strains on *Pseudonocardia*-infused media (Fig. 1A). Since the control plates  
474 showed that *non-producers* have higher intrinsic growth rates, we attribute the  
475 restricted growth on *Pseudonocardia*-infused plates to inhibition by *Pseudonocardia*  
476 metabolites, consistent with the large number of antibacterials documented as  
477 encoded in the genomes of both Ps1 and Ps2 (Holmes *et al.* 2016). We also showed  
478 that Ps2 is a stronger suppressor of bacterial growth in general, consistent with  
479 Andersen *et al.*'s (2013) observation that Ps2-hosting *Acromyrmex* colonies assemble  
480 lower-diversity (and more Ps2-dominated) cuticular biofilms on foraging workers.  
481 Finally, we confirmed that our *producer* strains (all genus *Streptomyces*) had higher  
482 resistance to antibiotics than did our *non-producer* strains (Fig. 3).

483 Our pairwise competition experiment confirmed that growing on *Pseudonocardia*-  
484 infused media renders *producer* strains competitively superior (i.e. they usually win)  
485 or at least resistant to exclusion (they more often draw than lose, especially on the  
486 less-toxic Ps1-infused media) (Fig. 2). This *in vitro* experiment mimics the conditions  
487 we expect to occur on the cuticle of *Acromyrmex* workers after their full-body  
488 *Pseudonocardia* biofilm (obtained shortly after hatching) has retreated to the  
489 laterocervical chest plates (and possibly into the subcuticular glands), when the  
490 workers begin to forage outside the nest, where they are exposed to many bacterial  
491 colonists (Poulsen *et al.* 2005; Andersen *et al.* 2013; Marsh *et al.* 2014; Andersen *et*  
492 *al.* 2015).

493 Taken together, these results show how a single, vertically transmitted, antibiotic-  
494 producing symbiont such as *Pseudonocardia* can be used by the ant host to create a



495 demanding environment on the ant surface that favours the recruitment of a more  
496 diverse set of antibiotic-producers. In short, vertical transmission of one mutualist  
497 enables the successful horizontal acquisition of other mutualists. Vertical transmission  
498 and horizontal symbiont acquisition are therefore not mutually exclusive  
499 explanations, consistent with a mixture of both not being uncommon in other  
500 symbioses (Ebert 2013; Bourguignon *et al.* 2018; da Costa & Poulsen 2018; Ivens *et*  
501 *al.* 2018). Under some circumstances, mutualistic stability through screening may be  
502 able to do without a vertically transmitted symbiont; Duarte *et al.* (2018) have argued  
503 that a host might be able to create a suitably demanding environment by evolving the  
504 right set of chemical exudates.

505 We note that in a colonial social insect, one needs to be precise about symbiont  
506 transmission and symbiont inheritance. Since virgin *Acromyrmex* queens are  
507 inoculated upon hatching by nurse workers that maintain monocultures of either Ps1  
508 or Ps2, the secondary acquisition of other *producer* symbionts by foraging workers is  
509 highly unlikely to disrupt verticality in the inheritance of native *Pseudonocardia*  
510 symbionts down the generations.

511 *Acromyrmex-resident non-producers.* – We also ran a growth-rate experiment with a  
512 set of *resident non-producer* strains that had been isolated from *Acromyrmex* ant  
513 cuticles (Fig. 1B) and found that they generally had low intrinsic growth rates,  
514 making it unlikely that they can competitively exclude *producers*. It seems surprising  
515 that we found these *non-producer* strains at all, but we note that the fact that we could  
516 isolate them does not imply that they are abundant. Resident *non-producer* taxa are  
517 only found on some (not all) field-sampled *Acromyrmex* workers (Andersen *et al.*  
518 2013; Innocent *et al.*, in prep) and generally below 1% prevalence when measured by  
519 amplicon read number. They may only be transient environmental contaminants,

520 since many were isolated via whole-ant washes, or strains persisting in non-  
521 equilibrium dynamics. In simulation models (Boza, G., Worsley, S., Yu, D.,  
522 Scheuring, I., unpubl. data), we have found that if bacterial competition is limited to  
523 nearest neighbours and if antibiotics slowly diffuse across the ant surface, even non-  
524 antibiotic-resistant strains can sometimes persist for long periods of time.

525

526 It remains an open question why three different *Acromyrmex* species in Panama all  
527 host the same two *Pseudonocardia* strains, Ps1 and Ps2 (Andersen *et al.* 2013). The  
528 genomes of Ps1 and Ps2 strains each encode a single distinct nystatin-like antifungal,  
529 plus variable and partially segregated sets of secondary metabolite biosynthetic gene  
530 clusters with predicted antibacterial functions (Holmes *et al.* 2016). These two  
531 *Pseudonocardia* species are almost never found in the same colony even though they  
532 are encountered at approximately equal rates in field colonies (Poulsen *et al.* 2005).  
533 The difference between Ps1 and Ps2 in microbiome invasibility (Fig. 1A) may reflect  
534 a tradeoff between stronger endogenous production of antimicrobials early in life  
535 against the recruitment of a more diverse set of secondary antibiotic producers later in  
536 life.

537

538 Comparable studies to ours using other species of fungus-growing ants will be needed  
539 to test the generalisability of screening to other attine ant lineages that maintain  
540 actinobacterial biofilms, including species that appear to have cuticular microbiota  
541 with abundant actinomycete genera other than *Pseudonocardia* (Sen *et al.* 2009;  
542 Andersen *et al.* 2013; Meirelles *et al.* 2014). Our results suggest that cuticular  
543 biofilms can be adequately simulated on agar plates, providing a tractable  
544 experimental model with which to test microbiome assembly mechanisms. Such

545 studies might also shed light on why *Atta* and some other genus-level branches of the  
546 attine fungus-growing ants have secondarily lost their cuticular biofilms, a  
547 phenomenon that remains poorly understood. The screening requirement to pair a  
548 demanding environment with a high reward imposes nontrivial costs on hosts, and in  
549 some cases, this cost might have tipped the cost-benefit ratio in favour of chemical  
550 pest control over biological control (Fernandez-Marin *et al.* 2009; Fernandez-Marin *et*  
551 *al.* 2015).

### 552 *Toward a general game theory of hosted microbiomes*

553 Hosted microbiomes are coevolutionary metacommunities in which most of the  
554 species interactions are difficult to observe. There are numerous calls to use  
555 ecological theory to understand microbiomes (Widder *et al.* 2016; Hoyer & Fenton  
556 2018), but we propose that a game theory approach may be more promising for  
557 producing testable predictions. Screening (Archetti *et al.* 2011a) and password  
558 signalling (Archetti *et al.* 2016) are candidate solutions to the Problem of Hidden  
559 Information. When hosts evolve to use screening, the emergence of demanding  
560 environments can be thought of as an exercise in applied ecology, where the host  
561 evolves a mechanism to foment and bias competition by modifying resource and  
562 toxicity levels to encourage cooperative microbial communities (see Foster *et al.*  
563 2017; Duarte *et al.* 2018 for similar perspectives).

## 564 **Acknowledgments**

565 The work was supported by the European Research Council (ERC Advanced grant 323085 to  
566 JJB), a Marie Curie Individual European Fellowship (IEF grant 627949 to TI), NERC grants  
567 NE/J01074X/1 to MH and DY and NE/M015033/1 and NE/M014657/1 to MH, DY and BW. D.  
568 W. Yu was supported by the National Natural Science Foundation of China (41661144002,

569 31670536, 31400470, 31500305), the Key Research Program of Frontier Sciences, CAS (  
570 QYZDY-SSW-SMC024), the Bureau of International Cooperation project (GJHZ1754), the  
571 Ministry of Science and Technology of China (2012FY110800), the University of East Anglia, the  
572 State Key Laboratory of Genetic Resources and Evolution at the Kunming Institute of Zoology,  
573 and the University of Chinese Academy of Sciences. IS is supported by National Research,  
574 Development and Innovation Office of Hungary (GINOP 2.3.2.-15-2016-0057). We thank the  
575 Smithsonian Tropical Research Institute for logistical help and facilities for all work in Gamboa,  
576 Panama, and the Autoridad Nacional del Ambiente y el Mar for permission to sample and export  
577 ants. We thank Ryan Seipke and Gergely Boza for input in developmental stages of the work;  
578 Elaine Patrick and Sylvia Matthiesen for lab and logistics support; Michael Poulsen, Saria Otani  
579 and Panos Sapountzis for useful technical advice and discussion. The authors declare no conflicts  
580 of interest.

581

## 582 **References**

- 583 Andersen, S.B., Hansen, L.H., Sapountzis, P., Sorensen, S.J. & Boomsma, J.J. (2013).  
584 Specificity and stability of the *Acromyrmex-Pseudonocardia* symbiosis. *Molecular*  
585 *Ecology*, 22, 4307-4321.  
586
- 587 Andersen, S.B., Yek, S.H., Nash, D.R. & Boomsma, J.J. (2015). Interaction  
588 specificity between leaf-cutting ants and vertically transmitted *Pseudonocardia*  
589 bacteria. *BMC Evolutionary Biology*, 15:27.  
590
- 591 Antwis, R.E. & Harrison, X.A. (2018). Probiotic consortia are not uniformly effective  
592 against different amphibian chytrid pathogen isolates. *Molecular Ecology*, 27, 577-  
593 589.  
594
- 595 Antwis, R.E., Preziosi, R.F., Harrison, X.A. & Garner, T.W.J. (2015). Amphibian  
596 symbiotic bacteria do not show a universal ability to inhibit growth of the global  
597 panzootic lineage of *Batrachochytrium dendrobatidis*. *Applied and Environmental*  
598 *Microbiology*, 81, 3706-3711.  
599
- 600 Archetti, M., Miller, J.B. & Yu, D.W. (2016). Evolution of passwords for cost-free,  
601 honest signalling between symbionts and hosts. *bioRxiv*.  
602
- 603 Archetti, M., Scheuring, I., Hoffman, M., Frederickson, M.E., Pierce, N.E. & Yu,  
604 D.W. (2011a). Economic game theory for mutualism and cooperation. *Ecology*  
605 *Letters*, 14, 1300-1312.  
606

- 607 Archetti, M., Ubeda, F., Fudenberg, D., Green, J., Pierce, N.E. & Yu, D.W. (2011b).  
608 Let the right one in: a microeconomic approach to partner choice in mutualisms.  
609 *American Naturalist*, 177, 75-85.  
610
- 611 Balouiri, M., Sadiki, M. & Ibsouda, S.K. (2016). Methods for in vitro evaluating  
612 antimicrobial activity: A review. *Journal of Pharmaceutical Analysis*, 6, 71-79.  
613
- 614 Barka, E.A., Vatsa, P., Sanchez, L., Gaveau-Vaillant, N., Jacquard, C., Klenk, H.-P. *et al.*  
615 *et al.* (2016). Taxonomy, physiology, and natural products of Actinobacteria.  
616 *Microbiology and Molecular Biology Reviews*, 80, 1-43.  
617
- 618 Barke, J., Seipke, R.F., Grüşchow, S., Heavens, D., Drou, N., Bibb, M.J. *et al.* (2010).  
619 A mixed community of actinomycetes produce multiple antibiotics for the fungus  
620 farming ant *Acromyrmex octospinosus*. *BMC Biology*, 8:109.  
621
- 622 Barke, J., Seipke, R.F., Yu, D.W. & Hutchings, M.I. (2011). A mutualistic  
623 microbiome. *Communicative & Integrative Biology*, 4, 41-43.  
624
- 625 Bates, D., Mächler, M., Bolker, B. & Walker, S. (2015). Fitting linear mixed-effects  
626 models using lme4. *Journal Of Statistical Software* 1-48.  
627
- 628 Bourguignon, T., Lo, N., Dietrich, C., Šobotník, J., Sidek, S., Roisin, Y. *et al.* (2018).  
629 Rampant host switching shaped the termite gut microbiome. *Current Biology*, 28,  
630 649-654.  
631
- 632 Bull, J.J. & Rice, W.R. (1991). Distinguishing mechanisms for the evolution of co-  
633 operation. *Journal of Theoretical Biology*, 149, 63-74.  
634
- 635 Cafaro, M.J., Poulsen, M., Little, A.E.F., Price, S.L., Gerardo, N.M., Wong, B. *et al.*  
636 (2011). Specificity in the symbiotic association between fungus-growing ants and  
637 protective *Pseudonocardia* bacteria. *Proceedings of the Royal Society B-Biological*  
638 *Sciences*, 278, 1814-1822.  
639
- 640 Currie, C.R., Poulsen, M., Mendenhall, J., Boomsma, J.J. & Billen, J. (2006).  
641 Coevolved crypts and exocrine glands support mutualistic bacteria in fungus-growing  
642 ants. *Science*, 311, 81-83.  
643
- 644 da Costa, R.R. & Poulsen, M. (2018). Mixed-Mode Transmission Shapes Termite Gut  
645 Community Assemblies. *Trends in Microbiology*, 7, 557-559.  
646
- 647 Duarte, A., Welch, M., Swannack, C., Wagner, J. & Kilner, R.M. (2018). Strategies  
648 for managing rival bacterial communities: Lessons from burying beetles. *Journal of*  
649 *Animal Ecology*, 87, 414-427.  
650
- 651 Ebert, D. (2013). The epidemiology and evolution of symbionts with mixed-mode  
652 transmission. *Annual Review of Ecology, Evolution, and Systematics*, 44, 623-643.  
653
- 654 Edwards, D.P., Hassall, M., Sutherland, W.J. & Yu, D.W. (2006). Selection for  
655 protection in an ant–plant mutualism: host sanctions, host modularity, and the

- 656 principal–agent game. *Proceedings of the Royal Society B: Biological Sciences*, 273,  
657 595-602.
- 658
- 659 Engl, T., Kroiss, J., Kai, M., Nechitaylo, T.Y., Svatoš, A. & Kaltenpoth, M. (2018).  
660 Evolutionary stability of antibiotic protection in a defensive symbiosis. *Proceedings*  
661 *of the National Academy of Sciences*, 115, E2020-E2029.
- 662
- 663 Fernandez-Marin, H., Nash, D.R., Higginbotham, S., Estrada, C., van Zweden, J.S.,  
664 d'Ettorre, P. *et al.* (2015). Functional role of phenylacetic acid from metapleural gland  
665 secretions in controlling fungal pathogens in evolutionarily derived leaf-cutting ants.  
666 *Proceedings of the Royal Society B-Biological Sciences*, 282: 20150212.
- 667
- 668 Fernandez-Marin, H., Zimmerman, J.K., Nash, D.R., Boomsma, J.J. & Wcislo, W.T.  
669 (2009). Reduced biological control and enhanced chemical pest management in the  
670 evolution of fungus farming in ants. *Proceedings of the Royal Society B-Biological*  
671 *Sciences*, 276, 2263-2269.
- 672
- 673 Foster, K.R., Chluter, J.S., Oyte, K.Z.C. & Rakoff-Nahoum, S. (2017). The evolution  
674 of the host microbiome as an ecosystem on a leash. *Nature*, 548, 43-51.
- 675
- 676 Grafen, A. (1990). Biological signals as handicaps. *Journal of Theoretical Biology*,  
677 144, 517-546.
- 678
- 679 Heil, M. (2013). Let the best one stay: screening of ant defenders by Acacia host  
680 plants functions independently of partner choice or host sanctions. *Journal of*  
681 *Ecology*, 101, 684-688.
- 682
- 683 Holmes, N.A., Innocent, T.M., Heine, D., Al Bassam, M., Worsley, S.F., Trottmann,  
684 F. *et al.* (2016). Genome analysis of two *Pseudonocardia* phylotypes associated with  
685 *Acromyrmex* leafcutter ants reveals their biosynthetic potential. *Frontiers in*  
686 *Microbiology*, 7:2073.
- 687
- 688 Hoye, B.J. & Fenton, A. (2018). Animal host–microbe interactions. *Journal of Animal*  
689 *Ecology*, 87, 315-319.
- 690
- 691 Ivens, A.B.F., Gadau, A., Kiers, E.T. & Kronauer, D.J.C. (2018). Can social  
692 partnerships influence the microbiome? Insights from ant farmers and their  
693 trophobiont mutualists. *Molecular Ecology*, 27, 1898-1914.
- 694
- 695 Kaltenpoth, M. (2009). Actinobacteria as mutualists: general healthcare for insects?  
696 *Trends in Microbiology*, 17, 529-535.
- 697
- 698 Loudon, A.H., Venkataraman, A., Van Treuren, W., Woodhams, D.C., Parfrey, L.W.,  
699 McKenzie, V.J. *et al.* (2016). Vertebrate hosts as islands: Dynamics of selection,  
700 immigration, loss, persistence, and potential function of bacteria on salamander skin.  
701 *Frontiers in Microbiology*, 7:333.
- 702
- 703 Marsh, S.E., Poulsen, M., Pinto-Tomas, A. & Currie, C.R. (2014). Interaction  
704 between workers during a short time window is required for bacterial symbiont  
705 transmission in *Acromyrmex* leaf-cutting ants. *Plos One*, 9, e103269.



- 706  
707 Mattoso, T.C., Moreira, D.D.O. & Samuels, R.I. (2012). Symbiotic bacteria on the  
708 cuticle of the leaf-cutting ant *Acromyrmex subterraneus subterraneus* protect workers  
709 from attack by entomopathogenic fungi. *Biology Letters*, 8, 461-464.  
710  
711 Meirelles, L.A., Mendes, T.D., Solomon, S.E., Bueno, O.C., Pagnocca, F.C. &  
712 Rodrigues, A. (2014). Broad *Escovopsis* inhibition activity of *Pseudonocardia*  
713 associated with *Trachymyrmex* ants. *Env Microbiol Rep*, 6, 339-345.  
714  
715 Mueller, U.G. (2012). Symbiont recruitment versus ant-symbiont co-evolution in the  
716 attine ant–microbe symbiosis. *Current Opinion in Microbiology*, 15, 269-277.  
717  
718 Poulsen, M., Bot, A.N.M. & Boomsma, J.J. (2003a). The effect of metapleural gland  
719 secretion on the growth of a mutualistic bacterium on the cuticle of leaf-cutting ants.  
720 *Naturwissenschaften*, 90, 406-409.  
721  
722 Poulsen, M., Bot, A.N.M., Currie, C.R., Nielsen, M.G. & Boomsma, J.J. (2003b).  
723 Within-colony transmission and the cost of a mutualistic bacterium in the leaf-cutting  
724 ant *Acromyrmex octospinosus*. *Functional Ecology*, 17, 260-269.  
725  
726 Poulsen, M., Cafaro, M., Boomsma, J.J. & Currie, C.R. (2005). Specificity of the  
727 mutualistic association between actinomycete bacteria and two sympatric species of  
728 *Acromyrmex* leaf-cutting ants. *Molecular Ecology*, 14, 3597-3604.  
729  
730 Ranger, C.M., Biedermann, P.H.W., Phuntumart, V., Beligala, G.U., Ghosh, S.,  
731 Palmquist, D.E. *et al.* (2018). Symbiont selection via alcohol benefits fungus farming  
732 by ambrosia beetles. *Proceedings of the National Academy of Sciences*, 4447-4452.  
733  
734 Rueden, C.T., Schindelin, J., Hiner, M.C., DeZonia, B.E., Walter, A.E., Arena, E.T. *et*  
735 *al.* (2017). ImageJ2: ImageJ for the next generation of scientific image data. *BMC*  
736 *Bioinformatics*, 18, 529.  
737  
738 Scheuring, I. & Yu, D.W. (2012). How to assemble a beneficial microbiome in three  
739 easy steps. *Ecology Letters*, 15, 1300-1307.  
740  
741 Schindelin, J., Arganda-Carreras, I., Frise, E., Kaynig, V., Longair, M., Pietzsch, T. *et*  
742 *al.* (2012). Fiji: an open-source platform for biological-image analysis. *Nature*  
743 *Methods*, 9, 676.  
744  
745 Seipke, R.F., Kaltenpoth, M. & Hutchings, M.I. (2012). *Streptomyces* as symbionts:  
746 an emerging and widespread theme? *FEMS Microbiology Reviews*, 36, 862-876.  
747  
748 Sen, R., Ishak, H.D., Estrada, D., Dowd, S.E., Hong, E.K. & Mueller, U.G. (2009).  
749 Generalized antifungal activity and 454-screening of *Pseudonocardia* and  
750 *Amycolatopsis* bacteria in nests of fungus-growing ants. *Proceedings of the National*  
751 *Academy of Sciences of the United States of America*, 106, 17805-17810.  
752  
753 Spence, M. (1973). Job market signaling *Quarterly Journal of Economics*, 87, 355–  
754 374.  
755

- 756 Van Arnam, E.B., Ruzzini, A.C., Sit, C.S., Horn, H., Pinto-Tomás, A.A., Currie, C.R.  
757 *et al.* (2016). Selvamycin, an atypical antifungal polyene from two alternative  
758 genomic contexts. *Proceedings of the National Academy of Sciences*, 113, 12940-  
759 12945.
- 760
- 761 Weyl, E.G., Frederickson, M.E., Yu, D.W. & Pierce, N.E. (2010). Economic contract  
762 theory tests models of mutualism. *Proceedings of the National Academy of Sciences*,  
763 107, 15712-15716.
- 764
- 765 Wickham, H., and G. Grolemund (2017). *R for data science*. O'Reilly Media.
- 766
- 767 Widder, S., Allen, R.J., Pfeiffer, T., Curtis, T.P., Wiuf, C., Sloan, W.T. *et al.* (2016).  
768 Challenges in microbial ecology: building predictive understanding of community  
769 function and dynamics. *The ISME Journal*, 10, 2557-2568.
- 770
- 771 Worsley, S.F., Innocent, T.M., Heine, D., Murrell, J.C., Yu, D.W., Wilkinson, B. *et*  
772 *al.* (2018). Symbiotic partnerships and their chemical interactions in the leafcutter  
773 ants (Hymenoptera: Formicidae). *Myrmecological News*, 27, 59-74.
- 774
- 775 Yu, D.W. (2001). Parasites of mutualisms. *Biological Journal of the Linnean Society*,  
776 72, 529-546.
- 777
- 778
